# Supplementary material
Source: publisher figshare collection journal article supplement (https://sage.figshare.com/ndownloader/files/27321689)
Supplement: Supplementary file 1 [file 27321689]

## Sheet: SuppS1
Supplemental Table S1. CpG Sites by Ethnicity in Genes Related to Xenobiotic Metabolism and Cancer (12 selected genes with 187 CpG sites total)
Probe ID	Position	Gene Name	Average % Methylation at CpG Site	Effect Estimate	SE	p-value	q-value	Near CpG Island?	Gene Feature (from UCSC RefGene)
cg23680900	chr15: 75017924	CYP1A1	7.84879	-0.0119154	0.00494901	0.016749	0.50859	North Shore	200 bp from TSS
cg10009577	chr15: 75018150	CYP1A1	3.7933	-0.0058134	0.00283206	0.0411454	0.536211	North Shore	1500 bp from TSS
cg20004910	chr15: 75018852	CYP1A1	1.43978	-0.00343551	0.00143568	0.0179167	0.50859	CpG Island	1500 bp from TSS
cg01936270	chr2: 38303680	CYP1B1	1.81984	-0.00415527	0.00186827	0.0273212	0.510906	CpG Island	1500 bp from TSS
cg22488859	chr2: 38303831	CYP1B1	0.712462	0.0014558	0.000684654	0.0381483	0.536211	CpG Island	1500 bp from TSS
cg08620474	chr2: 38304517	CYP1B1	1.31363	-0.00152351	0.000550074	0.00780659	0.486611	CpG Island	1500 bp from TSS
cg12802310	chr2: 38304720	CYP1B1	15.8784	-0.0178415	0.0082414	0.031188	0.517854	South Shore	1500 bp from TSS
cg21715189	chr2: 38304802	CYP1B1	51.1149	-0.0228591	0.0100357	0.0234723	0.50859	South Shore	1500 bp from TSS
cg26144569	chr2: 38304804	CYP1B1	76.398	-0.0296245	0.0108261	0.00665329	0.486611	South Shore	1500 bp from TSS
cg00396625	chr1: 225997836	EPHX1	1.1453	-0.00206027	0.000813629	0.0132154	0.50859	CpG Island	First Exon
cg10113031	chr1: 226012500	EPHX1	90.8418	-0.00686298	0.00298719	0.0224512	0.50859	Open Sea	1500 bp from TSS
cg24928687	chr1: 226012913	EPHX1	92.1896	-0.0158502	0.00794549	0.0468897	0.536211	Open Sea	200 bp from TSS
cg03459809	chr1: 226013010	EPHX1	77.4575	0.0138229	0.00694843	0.0475055	0.536211	Open Sea	First Exon
cg10213791	chr9: 125137380	PTGS1	84.7604	0.011212	0.00495654	0.0244776	0.50859	Open Sea	5' UTR
cg12489205	chr9: 125156765	PTGS1	91.3731	0.00844166	0.00280293	0.0029094	0.486611	Open Sea	3' UTR
cg11523984	chr2: 234602272	UGT1A6	78.6057	-0.0104854	0.00490056	0.0332313	0.517854	Open Sea	5' UTR
cg17852385	chr15: 75019188	CYP1A1	27.8502	-0.019908	0.0103245	0.0546423	0.536211	CpG Island	1500 bp from TSS
cg16439198	chr2: 38302674	CYP1B1	3.07802	-0.00477161	0.00247192	0.0547569	0.536211	CpG Island	5' UTR
cg16180556	chr1: 110230269	GSTM1	34.18	0.123488	0.0648251	0.0575794	0.536211	CpG Island	200 bp from TSS
cg10043869	chr9: 125133196	PTGS1	1.84621	-0.00233291	0.00122028	0.058366	0.536211	Open Sea	5' UTR
cg03797501	chr15: 75018774	CYP1A1	0.581689	0.000834524	0.000419198	0.0602162	0.536211	CpG Island	1500 bp from TSS
cg24776413	chr15: 75018065	CYP1A1	6.33624	-0.00706774	0.0038965	0.0706492	0.600519	North Shore	200 bp from TSS
cg10180406	chr1: 186649877	PTGS2	15.1348	-0.0099313	0.00555188	0.0744939	0.605668	CpG Island	1500 bp from TSS
cg05802560	chr22: 24381773	GSTT1	85.8545	0.0169089	0.00963118	0.0799214	0.622535	North Shelf	Gene body
cg19817399	chr15: 75018674	CYP1A1	2.21923	-0.00329155	0.0018969	0.0842902	0.622535	CpG Island	1500 bp from TSS
cg00565882	chr2: 38300707	CYP1B1	22.5711	-0.0149002	0.00867301	0.0865557	0.622535	North Shore	Gene body
cg19409149	chr2: 234608369	UGT1A6	92.154	0.00413819	0.00247033	0.0951346	0.63185	Open Sea	Gene body
cg01834566	chr2: 38303442	CYP1B1	5.58215	-0.00538278	0.00322681	0.0962917	0.63185	CpG Island	200 bp from TSS
cg10481417	chr15: 75018528	CYP1A1	3.592	-0.00476534	0.00290811	0.102357	0.63185	CpG Island	1500 bp from TSS
cg00501904	chr1: 226001675	EPHX1	82.6901	0.00949994	0.0058786	0.106833	0.63185	South Shelf	5' UTR
cg20254225	chr2: 38301438	CYP1B1	10.0555	-0.00864353	0.005349	0.106877	0.63185	CpG Island	Gene body
cg05525083	chr9: 125133153	PTGS1	1.39264	0.00118467	0.000746055	0.119406	0.63185	Open Sea	5' UTR
cg19155599	chr1: 186649153	PTGS2	4.39812	0.00402885	0.00267592	0.133248	0.63185	North Shore	Gene body
cg25837803	chr1: 186649909	PTGS2	1.70185	-0.00265278	0.00180757	0.143934	0.63185	CpG Island	1500 bp from TSS
cg18723873	chr15: 75018222	CYP1A1	0.477609	0.000553683	0.000350823	0.144116	0.63185	CpG Island	1500 bp from TSS
cg15011566	chr9: 125152552	PTGS1	16.3567	-0.0099688	0.00685547	0.146467	0.63185	Open Sea	Gene body
cg07301433	chr2: 38303999	CYP1B1	1.10244	-0.000863901	0.000588308	0.153948	0.63185	CpG Island	1500 bp from TSS
cg20408276	chr2: 38300586	CYP1B1	55.9669	-0.0218029	0.0153016	0.154649	0.63185	North Shore	Gene body
cg07493922	chr11: 67352222	GSTP1	85.7157	0.00562245	0.00395718	0.156066	0.63185	South Shore	Gene body
cg26424993	chr15: 75012169	CYP1A1	94.0237	0.00287678	0.00202862	0.157603	0.63185	Open Sea	3' UTR
cg23725454	chr11: 67350195	GSTP1	21.5122	0.0220006	0.015587	0.158543	0.63185	North Shore	1500 bp from TSS
cg15559700	chr2: 234579873	UGT1A9	93.847	0.0029895	0.00212331	0.160496	0.63185	Open Sea	1500 bp from TSS
cg25774326	chr9: 125145828	PTGS1	75.7111	0.00647902	0.00471405	0.169881	0.63185	Open Sea	Gene body
cg20433014	chr15: 75018583	CYP1A1	2.91752	-0.00385875	0.00286211	0.178459	0.63185	CpG Island	1500 bp from TSS
cg19435015	chr2: 234672508	UGT1A1	92.1039	0.00407767	0.00303552	0.179975	0.63185	Open Sea	Gene body
cg08761102	chr2: 38303844	CYP1B1	5.87872	-0.00385746	0.00287278	0.180209	0.63185	CpG Island	1500 bp from TSS
cg26704579	chr15: 75018690	CYP1A1	5.90577	-0.00592419	0.00443719	0.182379	0.63185	CpG Island	1500 bp from TSS
cg05667475	chr9: 125141146	PTGS1	85.5984	0.00547815	0.00410282	0.182387	0.63185	Open Sea	Gene body
cg19889264	chr15: 75018700	CYP1A1	2.91885	0.00253017	0.00192381	0.189941	0.63185	CpG Island	1500 bp from TSS
cg25866895	chr11: 67350326	GSTP1	51.4131	-0.0251029	0.019214	0.191677	0.63185	North Shore	1500 bp from TSS
cg14154487	chr9: 125133314	PTGS1	0.215518	0.000383606	0.000257757	0.192946	0.63185	Open Sea	5' UTR
cg07380506	chr2: 38303506	CYP1B1	2.08828	-0.00517202	0.00396937	0.193139	0.63185	CpG Island	200 bp from TSS
cg16101346	chr1: 186650479	PTGS2	14.7495	0.0115581	0.00891168	0.194968	0.63185	South Shore	1500 bp from TSS
cg05549655	chr15: 75019143	CYP1A1	20.8063	-0.0110056	0.00854316	0.197981	0.63185	CpG Island	1500 bp from TSS
cg17183213	chr15: 75012181	CYP1A1	86.1147	-0.0172826	0.0137233	0.208135	0.63185	Open Sea	3' UTR
cg06861880	chr2: 38303794	CYP1B1	4.12847	-0.0034674	0.00275715	0.20935	0.63185	CpG Island	1500 bp from TSS
cg23727072	chr15: 75019087	CYP1A1	19.6736	0.0082503	0.00661257	0.212454	0.63185	CpG Island	1500 bp from TSS
cg00166667	chr6: 52664983	GSTA1	79.1629	0.0128741	0.0103214	0.212519	0.63185	Open Sea	5' UTR
cg02453929	chr1: 226033217	EPHX1	63.6775	0.00593007	0.00479972	0.217023	0.63185	Open Sea	3' UTR
cg25856383	chr2: 38303219	CYP1B1	2.30359	-0.00252405	0.00204989	0.219485	0.63185	CpG Island	First Exon
cg13027682	chr15: 75018538	CYP1A1	0.655851	-0.000592244	0.000462238	0.220933	0.63185	CpG Island	1500 bp from TSS
cg15721577	chr9: 125137544	PTGS1	62.2904	0.0145279	0.0119459	0.224115	0.63185	Open Sea	5' UTR
cg18820295	chr2: 234599330	UGT1A6	92.2665	-0.00310309	0.00256046	0.226398	0.63185	Open Sea	1500 bp from TSS
cg03648789	chr2: 38304037	CYP1B1	3.13999	-0.00167999	0.00138683	0.228315	0.63185	CpG Island	1500 bp from TSS
cg00353139	chr15: 75017914	CYP1A1	1.98081	0.0031506	0.00261638	0.229337	0.63185	North Shore	200 bp from TSS
cg14202546	chr1: 226026827	EPHX1	86.7908	0.00457434	0.0038075	0.230048	0.63185	Open Sea	Gene body
cg05385434	chr1: 225998870	EPHX1	31.2596	-0.0101769	0.00848912	0.230788	0.63185	South Shore	5' UTR
cg17211296	chr1: 226016389	EPHX1	92.2626	-0.00301566	0.00251416	0.231215	0.63185	Open Sea	5' UTR
cg06264984	chr2: 38300885	CYP1B1	20.7521	-0.00793567	0.00665257	0.233142	0.63185	North Shore	Gene body
cg24330042	chr22: 24384159	GSTT1	5.51972	-0.00855032	0.00722722	0.236974	0.633058	CpG Island	First Exon
cg00370022	chr15: 75015192	CYP1A1	80.7757	-0.00466577	0.00407157	0.252158	0.648343	North Shelf	Gene body
cg21982879	chr1: 226015772	EPHX1	87.0588	0.00367188	0.00321703	0.254213	0.648343	Open Sea	5' UTR
cg06928838	chr11: 67351490	GSTP1	2.47431	0.00189458	0.00165977	0.25545	0.648343	CpG Island	Gene body
cg01919118	chr15: 75018731	CYP1A1	1.71066	-0.000839083	0.000725687	0.256564	0.648343	CpG Island	1500 bp from TSS
cg07422329	chr1: 186642182	PTGS2	81.2364	0.0108961	0.00989533	0.270874	0.665603	Open Sea	3' UTR
cg19417324	chr9: 125133014	PTGS1	5.03682	0.00400797	0.00364138	0.271387	0.665603	Open Sea	1500 bp from TSS
cg12101586	chr15: 75019203	CYP1A1	45.0859	-0.0151897	0.0139522	0.27628	0.665603	CpG Island	1500 bp from TSS
cg21813439	chr1: 226015775	EPHX1	87.8721	0.00317428	0.00292059	0.277631	0.665603	Open Sea	5' UTR
cg11735238	chr2: 38302594	CYP1B1	2.56646	0.00225468	0.0020936	0.282565	0.667056	CpG Island	5' UTR
cg23510527	chr2: 234601443	UGT1A6	93.0163	0.00283661	0.0026517	0.285372	0.667056	Open Sea	200 bp from TSS
cg10493166	chr9: 125133121	PTGS1	1.63379	-0.00189644	0.0017963	0.292511	0.675304	Open Sea	200 bp from TSS
cg05605921	chr1: 225998232	EPHX1	4.88931	-0.00430563	0.00416835	0.301807	0.678906	CpG Island	5' UTR
cg14957547	chr2: 38303386	CYP1B1	1.62551	-0.000725966	0.000698311	0.308243	0.678906	CpG Island	200 bp from TSS
cg03337430	chr1: 226012507	EPHX1	92.2832	0.0035056	0.00344964	0.309803	0.678906	Open Sea	1500 bp from TSS
cg19114214	chr11: 67349590	GSTP1	18.5247	-0.00984544	0.00979017	0.314492	0.678906	North Shore	1500 bp from TSS
cg08482694	chr1: 186649530	PTGS2	1.72735	-0.00111255	0.00109987	0.315636	0.678906	CpG Island	5' UTR
cg20316779	chr1: 225997649	EPHX1	0.471034	0.000430886	0.000405452	0.315855	0.678906	CpG Island	200 bp from TSS
cg04920951	chr11: 67351271	GSTP1	0.454792	-0.000344969	0.000340798	0.350067	0.733584	CpG Island	First Exon
cg05062676	chr2: 38304725	CYP1B1	13.2279	-0.00954886	0.0102788	0.352704	0.733584	South Shore	1500 bp from TSS
cg26250609	chr11: 67351273	GSTP1	0.260872	0.000255727	0.000235866	0.353062	0.733584	CpG Island	First Exon
cg09130556	chr2: 38304030	CYP1B1	0.910265	0.000530442	0.00057264	0.36841	0.757063	CpG Island	1500 bp from TSS
cg04646928	chr2: 234602174	UGT1A6	93.2774	0.00224246	0.00259022	0.387037	0.781319	Open Sea	5' UTR
cg10107264	chr6: 52669712	GSTA1	77.666	-0.00478745	0.00555436	0.388571	0.781319	Open Sea	1500 bp from TSS
cg04679156	chr9: 125156325	PTGS1	71.8424	-0.00462768	0.00554536	0.403806	0.795188	Open Sea	3' UTR
cg07078841	chr2: 38303138	CYP1B1	7.1313	0.00328911	0.00394147	0.403973	0.795188	CpG Island	First Exon
cg13974165	chr9: 125132600	PTGS1	75.9568	-0.00593286	0.00724188	0.412384	0.80329	Open Sea	1500 bp from TSS
cg23714547	chr2: 234668865	UGT1A1	91.6087	0.00259816	0.00324104	0.422836	0.815159	Open Sea	200 bp from TSS
cg24350360	chr1: 225997662	EPHX1	3.48972	-0.00237112	0.00299451	0.428609	0.817733	CpG Island	200 bp from TSS
cg05244766	chr11: 67350499	GSTP1	86.9295	0.00345589	0.00440821	0.432917	0.817733	North Shore	1500 bp from TSS
cg20360785	chr9: 125138922	PTGS1	19.8157	0.00543803	0.00702276	0.438432	0.818388	Open Sea	5' UTR
cg11060528	chr1: 226017146	EPHX1	86.4268	0.00309171	0.00402825	0.44267	0.818388	Open Sea	Gene body
cg15633273	chr1: 225997038	EPHX1	95.0862	-0.00163398	0.00214307	0.446394	0.818388	North Shore	1500 bp from TSS
cg17214126	chr9: 125133161	PTGS1	2.19305	-0.00095798	0.00129482	0.461667	0.823254	Open Sea	5' UTR
cg17468616	chr1: 226013212	EPHX1	91.3405	0.00222709	0.00305829	0.466544	0.823254	Open Sea	First Exon
cg00501774	chr9: 125132660	PTGS1	61.9926	-0.00303524	0.00423647	0.473531	0.823254	Open Sea	1500 bp from TSS
cg16060486	chr2: 38303472	CYP1B1	0.656162	0.000381227	0.000513635	0.474031	0.823254	CpG Island	200 bp from TSS
cg18451022	chr2: 38303145	CYP1B1	13.9701	-0.00416461	0.00592818	0.482052	0.823254	CpG Island	First Exon
cg22655140	chr1: 226026304	EPHX1	90.9454	-0.0020127	0.00292141	0.490928	0.823254	Open Sea	Gene body
cg18335243	chr1: 186649519	PTGS2	0.521594	-0.000327692	0.000459565	0.495357	0.823254	CpG Island	5' UTR
cg23549225	chr2: 38303797	CYP1B1	4.21463	-0.00216215	0.00317715	0.496153	0.823254	CpG Island	1500 bp from TSS
cg26564040	chr1: 186649812	PTGS2	1.51574	-0.000732769	0.00110069	0.508651	0.823254	CpG Island	1500 bp from TSS
cg02162897	chr2: 38300537	CYP1B1	83.2088	-0.00589587	0.00906954	0.515239	0.823254	North Shore	Gene body
cg01410359	chr2: 38302230	CYP1B1	20.5258	-0.00347425	0.00534784	0.515607	0.823254	CpG Island	Gene body
cg10433022	chr2: 234599911	UGT1A6	91.4541	0.00160611	0.0024705	0.515856	0.823254	Open Sea	1500 bp from TSS
cg23151000	chr2: 38302892	CYP1B1	2.08424	-0.000616677	0.000942862	0.517357	0.823254	CpG Island	5' UTR
cg14176942	chr9: 125146434	PTGS1	89.9094	0.00243891	0.00378165	0.518808	0.823254	Open Sea	Gene body
cg12925764	chr15: 75018266	CYP1A1	0.564576	0.000281999	0.000413868	0.518914	0.823254	CpG Island	1500 bp from TSS
cg23070111	chr1: 186649985	PTGS2	1.73751	-0.000520898	0.000796948	0.519487	0.823254	CpG Island	1500 bp from TSS
cg06342062	chr15: 75016002	CYP1A1	79.5711	-0.00387384	0.00617367	0.529992	0.830882	North Shelf	5' UTR
cg27550915	chr1: 226016491	EPHX1	91.8269	0.00165423	0.00269401	0.539287	0.830882	Open Sea	Gene body
cg00524289	chr1: 225996377	EPHX1	90.911	0.00209432	0.00345165	0.543886	0.830882	North Shore	1500 bp from TSS
cg01103387	chr2: 38301143	CYP1B1	7.76552	-0.00293141	0.00485608	0.545776	0.830882	North Shore	Gene body
cg17419623	chr1: 186649559	PTGS2	1.32188	0.00044683	0.000728103	0.546516	0.830882	CpG Island	200 bp from TSS
cg18695564	chr1: 226022133	EPHX1	93.3223	0.00131971	0.00225156	0.558103	0.840024	Open Sea	Gene body
cg05357229	chr2: 234616060	UGT1A6	83.6594	-0.00378184	0.00656984	0.564481	0.840024	Open Sea	Gene body
cg11566244	chr11: 67351786	GSTP1	10.5853	0.00433119	0.00755516	0.566055	0.840024	CpG Island	Gene body
cg06330670	chr9: 125136454	PTGS1	89.9733	0.00611056	0.0107832	0.570497	0.840024	Open Sea	5' UTR
cg13630095	chr9: 125137594	PTGS1	35.3915	-0.00326759	0.00630393	0.603844	0.882178	Open Sea	Gene body
cg25135322	chr11: 67350153	GSTP1	10.4137	-0.00461696	0.00912668	0.612521	0.887918	North Shore	1500 bp from TSS
cg07057636	chr2: 38303504	CYP1B1	3.83352	-0.00181871	0.00369814	0.622663	0.892764	CpG Island	200 bp from TSS
cg13570656	chr15: 75019196	CYP1A1	31.4264	-0.00805631	0.0166346	0.627717	0.892764	CpG Island	1500 bp from TSS
cg17545445	chr1: 186648244	PTGS2	89.88	0.00180919	0.00381388	0.635013	0.892764	North Shore	Gene body
cg00213123	chr15: 75019070	CYP1A1	13.8868	-0.00271903	0.00576834	0.637021	0.892764	CpG Island	1500 bp from TSS
cg14407177	chr2: 38298023	CYP1B1	92.5589	0.00110375	0.00236248	0.640506	0.892764	North Shelf	Gene body
cg03890222	chr2: 38302487	CYP1B1	8.16193	-0.00293011	0.0067922	0.665811	0.892764	CpG Island	Gene body
cg11834764	chr1: 226028842	EPHX1	89.6918	0.0024443	0.00567762	0.666479	0.892764	Open Sea	Gene body
cg11656478	chr2: 38297759	CYP1B1	41.5126	-0.00438036	0.0101772	0.666489	0.892764	North Shelf	3' UTR
cg13986130	chr1: 186649330	PTGS2	2.64751	-0.000876331	0.00203795	0.667511	0.892764	CpG Island	Gene body
cg02279452	chr1: 225996974	EPHX1	91.7295	0.00125307	0.00296577	0.67257	0.892764	North Shore	1500 bp from TSS
cg24887140	chr1: 186649639	PTGS2	1.852	0.000436176	0.00102896	0.674124	0.892764	CpG Island	200 bp from TSS
cg26036993	chr2: 38303899	CYP1B1	2.37414	-0.000558442	0.00132457	0.674644	0.892764	CpG Island	1500 bp from TSS
cg03779055	chr9: 125132413	PTGS1	90.4077	0.00161537	0.00389267	0.677928	0.892764	Open Sea	1500 bp from TSS
cg26513734	chr1: 225996982	EPHX1	93.6236	-0.00105663	0.00265479	0.690622	0.903121	North Shore	1500 bp from TSS
cg27426425	chr15: 75018259	CYP1A1	0.823822	-0.000184183	0.000450695	0.696353	0.904292	CpG Island	1500 bp from TSS
cg01478198	chr2: 234670284	UGT1A1	91.0432	-0.000959071	0.00263003	0.71536	0.922568	Open Sea	Gene body
cg23916318	chr2: 234599682	UGT1A6	66.7973	0.00235294	0.00699886	0.736399	0.933696	Open Sea	1500 bp from TSS
cg11406385	chr9: 125131613	PTGS1	90.9085	0.00113578	0.00343848	0.740999	0.933696	Open Sea	1500 bp from TSS
cg12763919	chr9: 125137580	PTGS1	37.2077	0.00269969	0.00820978	0.74194	0.933696	Open Sea	5' UTR
cg27051335	chr15: 75018733	CYP1A1	0.564417	0.0001558	0.000456029	0.743961	0.933696	CpG Island	1500 bp from TSS
cg18092474	chr15: 75019302	CYP1A1	45.7797	-0.00459545	0.0144686	0.750421	0.935525	CpG Island	1500 bp from TSS
cg08836767	chr9: 125132716	PTGS1	5.24146	-0.00118936	0.00385897	0.757726	0.936519	Open Sea	1500 bp from TSS
cg05935800	chr1: 226023590	EPHX1	86.1537	0.00158779	0.00530975	0.764646	0.936519	Open Sea	Gene body
cg14147740	chr1: 186649717	PTGS2	2.68931	-0.0013275	0.00446989	0.766243	0.936519	CpG Island	200 bp from TSS
cg16248783	chr2: 38304146	CYP1B1	1.80223	-0.000367191	0.00126189	0.772124	0.937579	CpG Island	1500 bp from TSS
cg22549041	chr15: 75019251	CYP1A1	25.3385	-0.00550266	0.0198979	0.781805	0.94321	CpG Island	1500 bp from TSS
cg05651106	chr1: 226015073	EPHX1	50.5471	-0.00474859	0.0176951	0.78811	0.944721	Open Sea	5' UTR
cg03138928	chr1: 226004826	EPHX1	88.3289	0.000913763	0.0036539	0.802369	0.955688	Open Sea	5' UTR
cg09456297	chr2: 38304066	CYP1B1	0.747547	-0.000131802	0.000546339	0.815127	0.964739	CpG Island	1500 bp from TSS
cg00690431	chr1: 186649354	PTGS2	0.678792	0.000192162	0.000880519	0.829157	0.971513	CpG Island	Gene body
cg09461185	chr1: 186649631	PTGS2	2.14193	-0.000262225	0.00122418	0.831241	0.971513	CpG Island	200 bp from TSS
cg27281884	chr9: 125137483	PTGS1	66.0329	-0.00248961	0.0140631	0.859266	0.979784	Open Sea	5' UTR
cg09799983	chr2: 38301756	CYP1B1	2.00523	0.000333694	0.00188976	0.860007	0.979784	CpG Island	Gene body
cg07512295	chr2: 234599026	UGT1A6	81.2105	0.00107238	0.00643614	0.86749	0.979784	Open Sea	1500 bp from TSS
cg04881125	chr1: 186649253	PTGS2	3.92882	0.000436033	0.00272069	0.87264	0.979784	North Shore	Gene body
cg23655854	chr15: 75015502	CYP1A1	83.7631	-0.000630272	0.00399906	0.874645	0.979784	North Shelf	5' UTR
cg01584760	chr2: 38296474	CYP1B1	91.3762	0.000434273	0.00297594	0.883922	0.979784	Open Sea	3' UTR
cg13953354	chr1: 226008710	EPHX1	92.6557	-0.000324712	0.00236258	0.890703	0.979784	Open Sea	5' UTR
cg26187962	chr1: 226011953	EPHX1	82.7743	-0.000655063	0.00508223	0.897316	0.979784	Open Sea	1500 bp from TSS
cg25147026	chr1: 186650441	PTGS2	36.1428	-0.00142362	0.0131612	0.913727	0.979784	South Shore	1500 bp from TSS
cg05010179	chr15: 75018495	CYP1A1	1.00475	7.39e-05	0.00070223	0.917677	0.979784	CpG Island	1500 bp from TSS
cg09038676	chr11: 67351608	GSTP1	3.4217	-0.000300803	0.002927	0.918109	0.979784	CpG Island	Gene body
cg12927153	chr9: 125133318	PTGS1	0.631323	-4.44e-05	0.000433858	0.922462	0.979784	Open Sea	5' UTR
cg05412478	chr1: 186649612	PTGS2	2.20776	-0.000123191	0.00126929	0.923037	0.979784	CpG Island	200 bp from TSS
cg08972579	chr9: 125137478	PTGS1	25.8671	-0.000820416	0.00861888	0.924051	0.979784	Open Sea	5' UTR
cg02196734	chr15: 75018032	CYP1A1	5.34879	0.000318638	0.00334935	0.924152	0.979784	North Shore	200 bp from TSS
cg01764553	chr2: 234673101	UGT1A1	75.483	-0.00111875	0.0121718	0.926652	0.979784	Open Sea	Gene body
cg09611756	chr15: 75018200	CYP1A1	4.86499	-0.000486745	0.00534809	0.927389	0.979784	CpG Island	1500 bp from TSS
cg02741964	chr9: 125136480	PTGS1	92.9079	0.000369443	0.00587194	0.949765	0.997325	Open Sea	5' UTR
cg26516004	chr15: 75019376	CYP1A1	97.3916	-0.000123917	0.00220297	0.955162	0.997325	South Shore	1500 bp from TSS
cg16915215	chr2: 234579903	UGT1A9	88.3136	-0.000731731	0.0165875	0.964757	0.997325	Open Sea	1500 bp from TSS
cg04069642	chr15: 75016096	CYP1A1	91.4099	0.000121243	0.00325604	0.970276	0.997325	North Shelf	5' UTR
cg03268860	chr1: 226012874	EPHX1	90.9388	9.36e-05	0.0030201	0.975258	0.997325	Open Sea	200 bp from TSS
cg23096144	chr1: 226012954	EPHX1	78.6944	-0.000140475	0.00501754	0.977637	0.997325	Open Sea	200 bp from TSS
cg24720192	chr2: 38304189	CYP1B1	0.410597	4.82e-06	0.000462672	0.992037	0.997325	CpG Island	1500 bp from TSS
cg11924019	chr15: 75019283	CYP1A1	40.7849	-8.73e-05	0.009837	0.992905	0.997325	CpG Island	1500 bp from TSS
cg13622587	chr1: 226014225	EPHX1	90.652	-2.17e-05	0.00323544	0.99465	0.997325	Open Sea	5' UTR
cg22224704	chr11: 67352041	GSTP1	30.3163	1.64e-05	0.00490013	0.997325	0.997325	South Shore	Gene body
Models adjust for age, gender, neutrophils, and PCs for technical variation. Effect estimate represents the proportion of DNA methylation difference in Hispanic (n=31) compared with non-Hispanic (n=163) firefighters.
CpG sites with a p-value <0.05 are listed first above the line.
TSS = transcription start site; UTR = untranslated region
All CpG sites passed quality control and were annotated to the genes according to UCSC RefGene.

## Sheet: SuppS2
Supplemental Table S2. Summary of Differentially Methylated CpG Sites by Ethnicity in Exploratory Epigenome-Wide Analysis, q-value<0.05
Model	# CpG Sites q<0.05		GIF**
	lower in Hispanic	higher in Hispanic
Model 1 (unadjusted)	24	9	0.969
Model 2 (adjusted, no cells)	45	15	1.312
Model 3 (fully adjusted)	54	22	1.271
Model 4 (fully adjusted + BMI)*	35	17	1.167
Model 5 (fully adjusted + smoking history)	52	21	1.279
Model 6 (fully adjusted + time as a firefighter)	58	24	1.27
*Model 4 includes 188 individuals that had BMI while the rest of the models including 196 subjects.
**GIF=Genomic Inflation Factor
The fully adjusted model includes age, gender, 3 PCs representing technical batch effects, and estimated proportion of Neutrophils.

## Sheet: SuppS3
Supplemental Table S3. Top Gene Concepts Enriched among the Most Significant CpG Sites by p-value for Ethnicity in the Epigenome-Wide Analysis
Concept ID	Ontology	Description	# Genes in Concept	# of Genes Differentially Methylated	p-value	q-value
GO
GO:0015629	CC	actin cytoskeleton	492	195	0.000369025	1
GO:0003779	MF	actin binding	414	172	0.00066966	1
GO:0008092	MF	cytoskeletal protein binding	936	348	0.000694317	1
GO:0043113	BP	receptor clustering	54	30	0.000741505	1
GO:0032092	BP	positive regulation of protein binding	84	42	0.000765895	1
GO:0051668	BP	localization within membrane	92	44	0.00138425	1
GO:1903911	BP	positive regulation of receptor clustering	6	6	0.00173098	1
GO:0050954	BP	sensory perception of mechanical stimulus	171	74	0.00174213	1
GO:0009154	BP	purine ribonucleotide catabolic process	27	17	0.00186006	1
GO:0010857	MF	calcium-dependent protein kinase activity	24	16	0.00193037	1
GO:0031994	MF	insulin-like growth factor I binding	13	10	0.00272141	1
GO:0009261	BP	ribonucleotide catabolic process	28	17	0.00300895	1
GO:0097427	CC	microtubule bundle	6	6	0.00305242	1
GO:0051764	BP	actin crosslink formation	12	9	0.00326659	1
GO:0062149	BP	detection of stimulus involved in sensory perception of pain	25	15	0.00331786	1
GO:0005856	CC	cytoskeleton	2162	689	0.00342345	1
GO:1901628	BP	positive regulation of postsynaptic membrane organization	5	5	0.0035446	1
GO:0030036	BP	actin cytoskeleton organization	677	255	0.00376184	1
GO:0015180	MF	L-alanine transmembrane transporter activity	9	7	0.00383285	1
GO:0015808	BP	L-alanine transport	9	7	0.00383285	1
GO:0009931	MF	calcium-dependent protein serine/threonine kinase activity	23	15	0.00420239	1
GO:0001958	BP	endochondral ossification	28	17	0.0043676	1
GO:0036075	BP	replacement ossification	28	17	0.0043676	1
GO:0070971	CC	endoplasmic reticulum exit site	26	14	0.00440954	1
GO:0006833	BP	water transport	21	10	0.00457152	1
KEGG
path:hsa04928	KEGG	Parathyroid hormone synthesis, secretion and action	105	47	0.0217191	1
path:hsa04520	KEGG	Adherens junction	70	34	0.0218814	1
path:hsa04974	KEGG	Protein digestion and absorption	96	38	0.0352705	1
path:hsa05017	KEGG	Spinocerebellar ataxia	139	54	0.036994	1
path:hsa04710	KEGG	Circadian rhythm	31	15	0.0387637	1
path:hsa04070	KEGG	Phosphatidylinositol signaling system	94	40	0.0361283	1
path:hsa04931	KEGG	Insulin resistance	105	42	0.0371297	1
path:hsa04072	KEGG	Phospholipase D signaling pathway	144	60	0.0485349	1
Abbreviations: GO=Gene Ontology, KEGG=Kyoto Encyclopedia of Genes and Genomes; MF=Molecular Function, CC=Cellular Component, BP=Biological Process
For GO, top 25 pathways are shown by raw p-value. For KEGG, pathways with p<0.05 are shown.
